# Supplementary material for: Multispecific resistance of sheep trichostrongylids in Austria
Source: PubMed Central journal article supplement (PMC8194391; doi:10.1051/parasite/2021048), 2021-06-11
Supplement: parasite-28-50-s1.pdf [file parasite-28-50-s1.pdf]

## **Comparison of different standards of eggCounts 2.3**

### **1. Methods**

The difference between the percentages of egg reduction between the two calculation methods (the standard “two sampled paired” and “two samples paired with individual efficacy”) was expressed as the absolute number of the difference in the estimated FECR “ $|\Delta\text{FECR}|$ ”. Also, for each animal the egg count reduction of individual animals (FECR<sub>i</sub>) was calculated with the formula  $100 \cdot (1 - \text{egg count after treatment} / \text{egg count before treatment})$ . For each farm, the coefficient of variation of FECR<sub>i</sub> was calculated (CV FECR<sub>i</sub>). Then,  $|\Delta\text{FECR}|$  on each farm was plotted against the CV FECR<sub>i</sub> for the same farm. The Spearman correlation coefficient between “CV FECR<sub>i</sub>” and  $|\Delta\text{FECR}|$  was computed (two-tailed, pairwise exclusion of missing data) with SPSS Statistics 24 (IBM GmbH, Ehningen, Germany). Furthermore, a scatter plot of both variables was generated.

### **2. Results:**

In most of the calculations “FEC paired” yielded results similar to “FEC paired with individual efficacy”. However, “FEC paired with individual efficacy” often resulted in higher efficacies when egg reduction in flocks was unevenly distributed. The  $|\Delta\text{FECR}|$  on farms correlated positively with CV FECR<sub>i</sub> “ $\Delta$  egg count standards” (Spearman-Rho= 0.78; p= 0.000) (Supplementary Figure 1).

### **3. Discussion**

The two standards of eggCounts for the calculation of FECR differed clearly when variability within a farm was high. As the standard with individual efficacy is considered to give a more precise estimate of FECR this might be the preferred standard to apply.
